# Supplementary material for: Anion exchange membranes containing no β-hydrogen atoms on ammonium groups: synthesis, properties, and alkaline stability
Source: PubMed Central journal article supplement (PMC8693587; doi:10.1039/d0ra09308d), 2021-01-04
Supplement: RA-011-D0RA09308D-s001.pdf [file RA-011-D0RA09308D-s001.pdf]

Supplementary information

## **Anion exchange membranes containing no $\beta$ -hydrogen atoms on ammonium groups: synthesis, properties, and alkaline stability**

Daniel Koronka<sup>a</sup> and Kenji Miyatake<sup>\*bcd</sup>

<sup>a</sup>*Interdisciplinary Graduate School of Medicine, Engineering, and Agricultural Sciences, University of Yamanashi, 4 Takeda, Kofu, Yamanashi 400-8510, Japan*

<sup>b</sup>*Fuel Cell Nanomaterials Center, University of Yamanashi, 4 Takeda, Kofu 400-8510, Japan*

<sup>c</sup>*Clean Energy Research Center, University of Yamanashi, 4 Takeda, Kofu 400-8510, Japan*

<sup>d</sup>*Department of Applied Chemistry, Waseda University, Tokyo 169-8555, Japan*

**Measurements.**  $^1\text{H}$ ,  $^{13}\text{C}$ , and  $^{19}\text{F}$  NMR spectra were recorded in  $\text{CDCl}_3$ , or  $\text{DMSO-}d_6$  containing tetramethylsilane as internal standard. The spectra recorded on a JEOL JNMECA500 spectrometer at room temperature. Molecular weight ( $M_n$  and  $M_w$ ) of the BAF-BS polymers were estimated by gel permeation chromatography (GPC) using a Shodex KF-805L or SBSB-803 column with a Jasco 805 UV detector. Chloroform with 0.02 M added triethylamine was used as eluent and calibration was done using polystyrene standards. Dynamic mechanical analyses (DMA) (Storage modulus ( $E'$  (Pa)), loss modulus ( $E''$  (Pa)) and  $\tan \delta$  ( $E''/E'$ )) were measured on an ITK DVA-225 dynamic viscoelastic analyzer at either 60% relative humidity (RH) between room temperature and 95 °C at a heating rate of 1 °C  $\text{min}^{-1}$ , or as a function of RH at fixed 80 °C between 0% and 100% RH. Tensile strength of the membrane samples was determined at fixed 80 °C and 60% RH while stretching the membrane at a rate of 0.1  $\text{mm s}^{-1}$ . Ion exchange capacity (IEC) of the quaternized membranes have been determined via Mohr titration method as reported in the literature.<sup>1</sup> Water uptake, ion conductivity, alkaline stability measurements were all carried out according to the literature.<sup>1</sup> For transmission electron microscopic (TEM) images, membrane samples (sized 5 mm by 5 mm) were ion exchanged to tetrachloroplatinate ions via submerging the samples into 0.5 M potassium tetrachloroplatinate (II) aqueous solution at 40 °C for 24 h. The ion exchange is followed by the washing of the membranes with deionized ultrapure (18 M $\Omega$ ) water at 40 °C for 24 h and dried under high-vacuum overnight. The obtained dry membranes were embedded into an epoxy resin, cut to 50 nm thickness via a Leica microtome Ultracut UCT and placed onto a copper mesh. The images of the samples were taken using a Hitachi H-9500 transmission electron microscope.

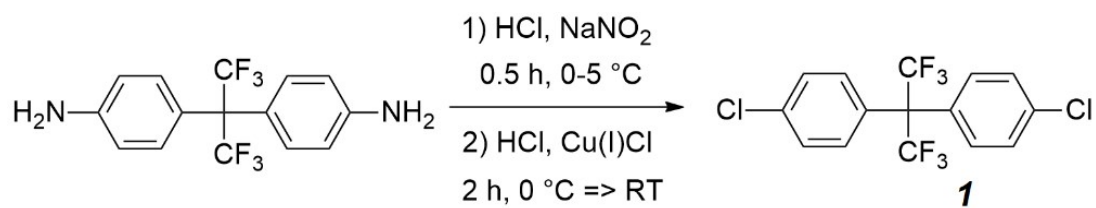

**Scheme S1** Synthesis of 2,2-bis(4-chlorophenyl)-hexafluoropropane (**1**).

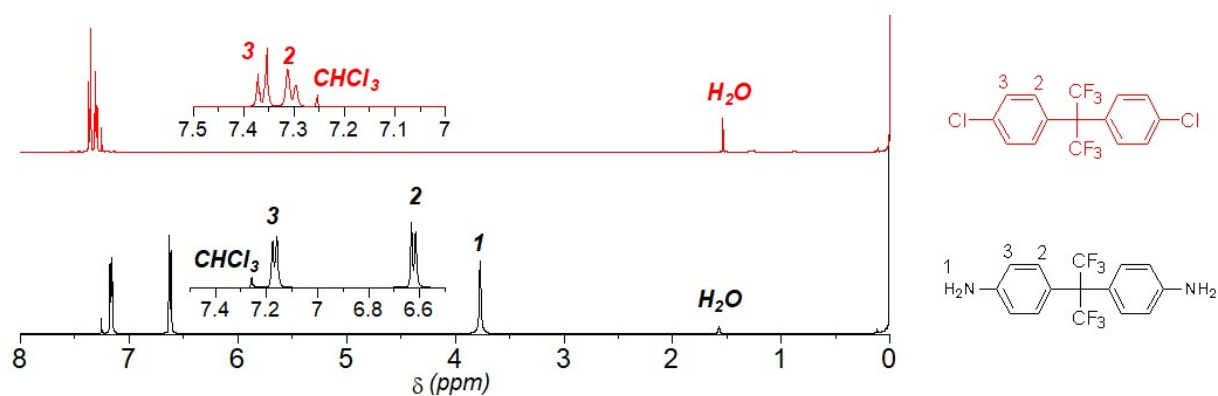

**Fig. S1**  $^1\text{H}$  NMR spectra of 2,2-bis(4-chlorophenyl)hexafluoropropane (**1**) (top) and 2,2-bis(4-aminophenyl)hexafluoropropane (bottom) in  $\text{CDCl}_3$ .

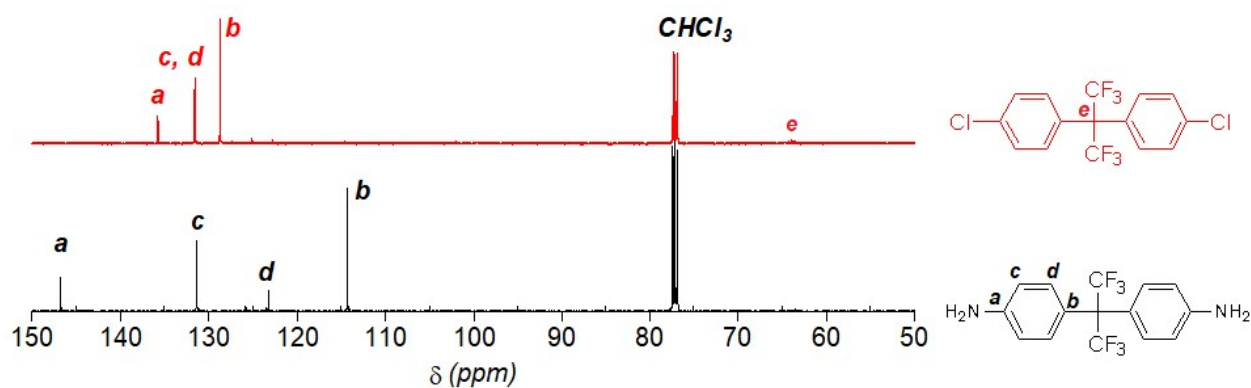

**Fig. S2**  $^{13}\text{C}$  NMR spectra of 2,2-bis(4-chlorophenyl)hexafluoropropane (**1**) (top) and 2,2-bis(4-aminophenyl)hexafluoropropane (bottom) in  $\text{CDCl}_3$ .

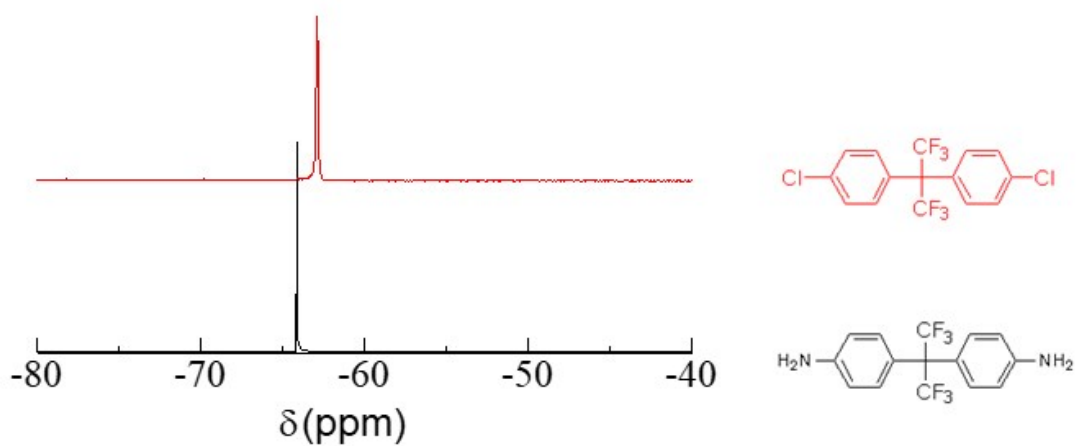

**Fig. S3**  $^{19}\text{F}$  NMR spectra of 2,2-bis(4-chlorophenyl)hexafluoropropane (**1**) (top) and 2,2-bis(4-aminophenyl)hexafluoropropane (bottom) in  $\text{CDCl}_3$ .

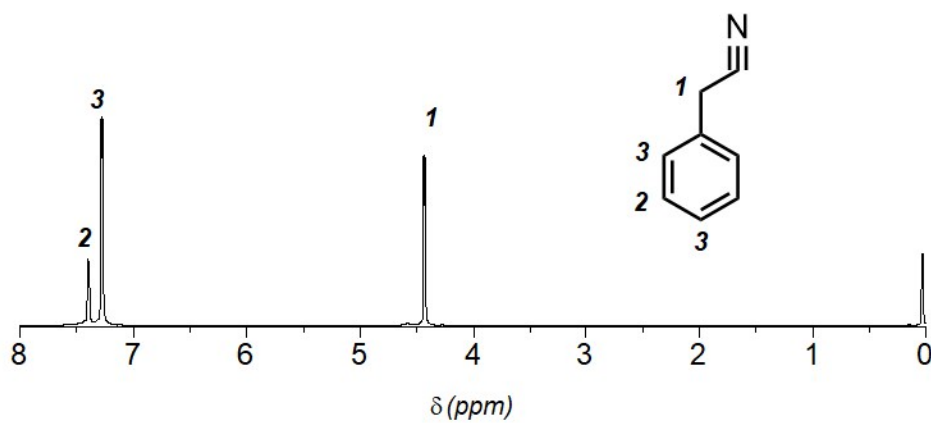

**Fig. S4**  $^1\text{H}$  NMR spectrum of phenylacetonitrile in  $\text{CDCl}_3$ .

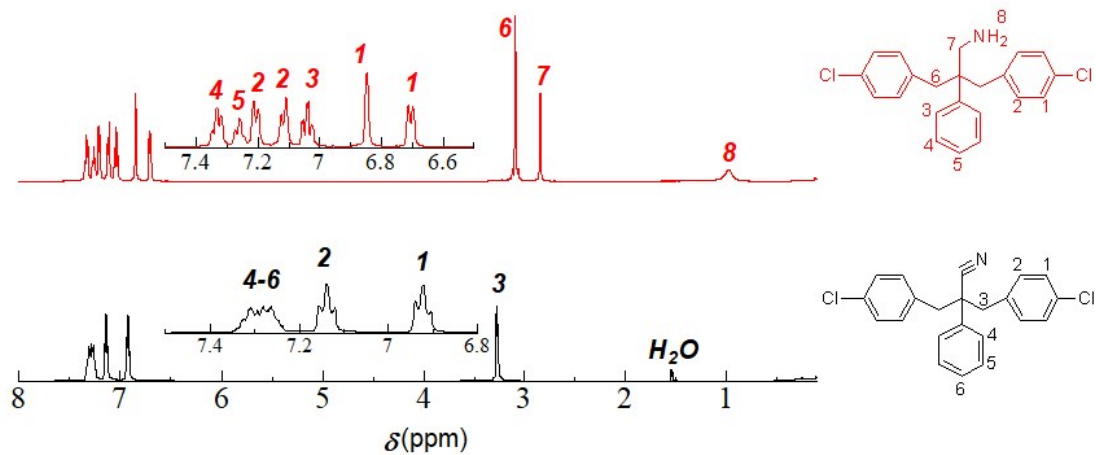

**Fig. S5** <sup>1</sup>H NMR spectra of 2,2-bis(4-chlorobenzyl)-2-phenyl-ethylamine (**3**) (top) and 2,2-bis(4-chlorobenzyl)-2-phenylacetonitrile (**2**) (bottom) in CDCl<sub>3</sub>.

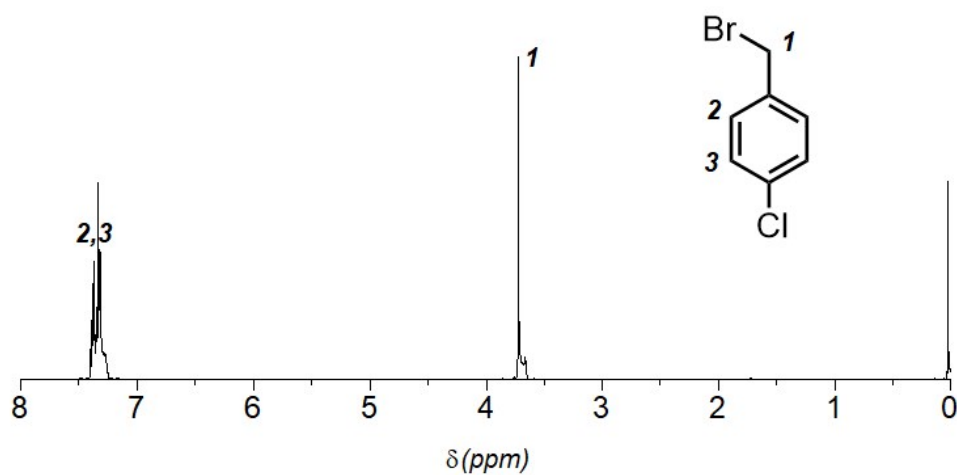

**Fig. S6** <sup>1</sup>H NMR spectrum of 4-chlorobenzyl bromide in CDCl<sub>3</sub>.

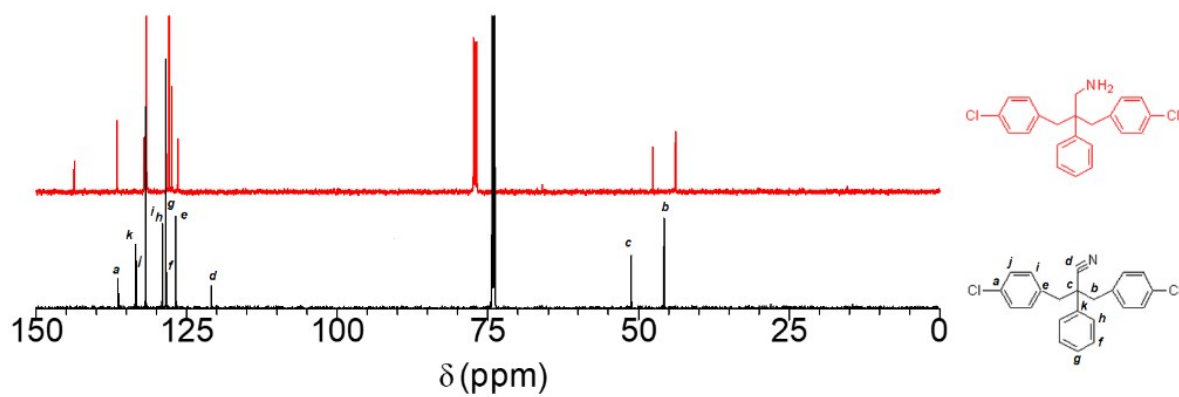

**Fig. S7**  $^{13}\text{C}$  NMR spectra of 2,2-bis(4-chlorobenzyl)-2-phenyl-ethylamine (**3**) (top) and 2,2-bis(4-chlorobenzyl)-2-phenylacetone nitrile (**2**) (bottom) in  $\text{CDCl}_3$ .

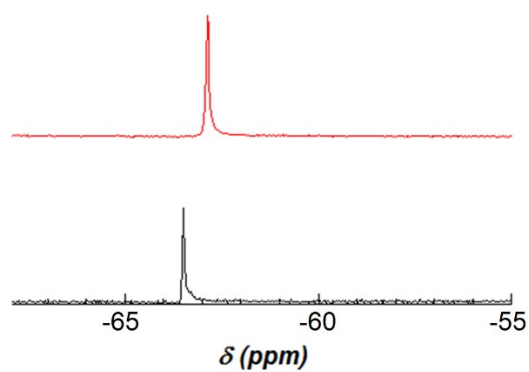

**Fig. S8**  $^{19}\text{F}$  NMR spectra of QBAF-BS in  $\text{DMSO}-d_6$  (top) and BAF-BS in  $\text{CDCl}_3$  (bottom).

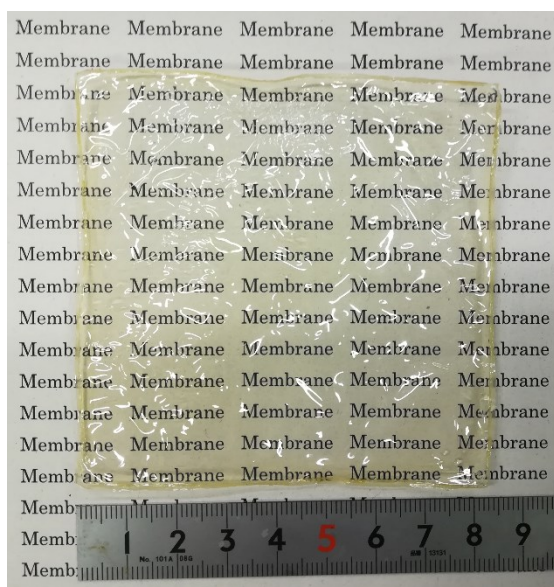

**Fig. S9** QBAF-BS2.25 membrane (thickness =  $40 \pm 7 \mu\text{m}$ ) obtained via casting from DMSO solution at  $50^\circ\text{C}$  overnight.

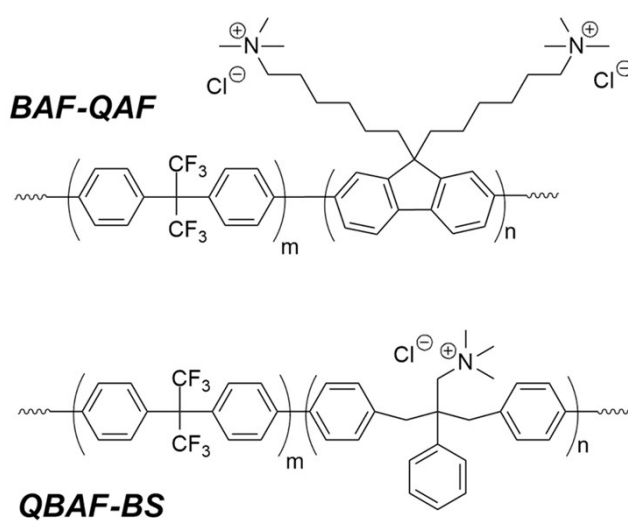

**Fig. S10** Structure of BAF-QAF and QBAF-BS copolymers.

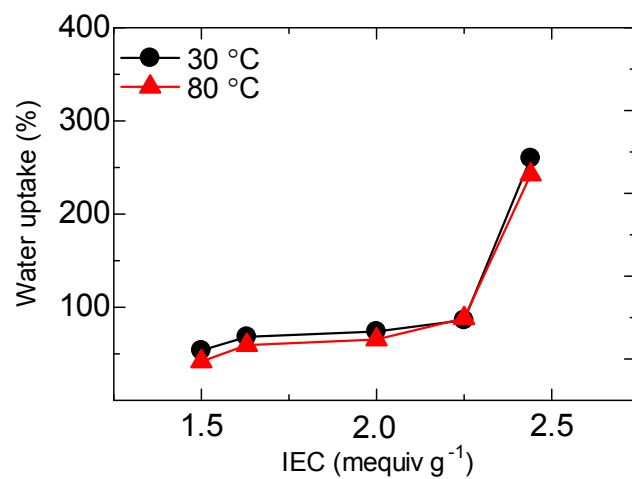

**Fig. S11** Water uptake (at 30 and 80 °C) of QBAF-BS membranes as a function of ion exchange capacity.

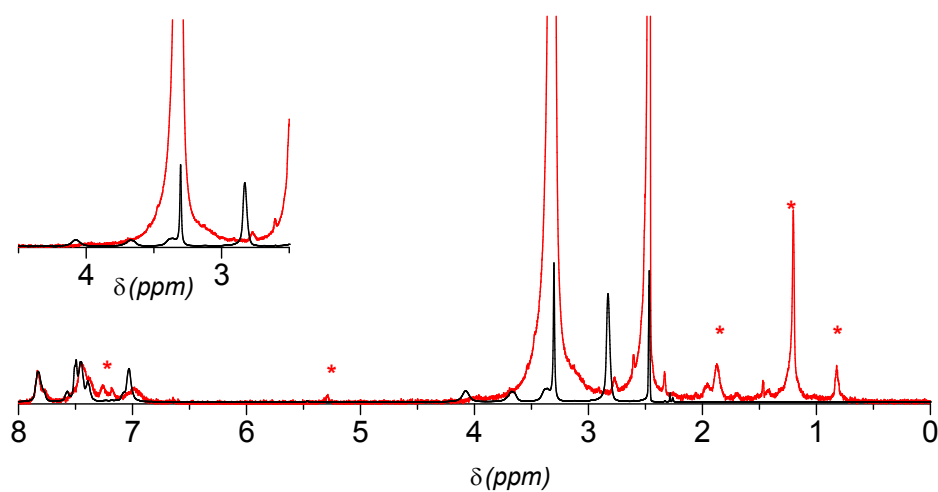

**Fig. S12** <sup>1</sup>H NMR spectra of the pristine (black, 0 h) and post-test (red, 150 h) QBAF-BS2.00 membrane.



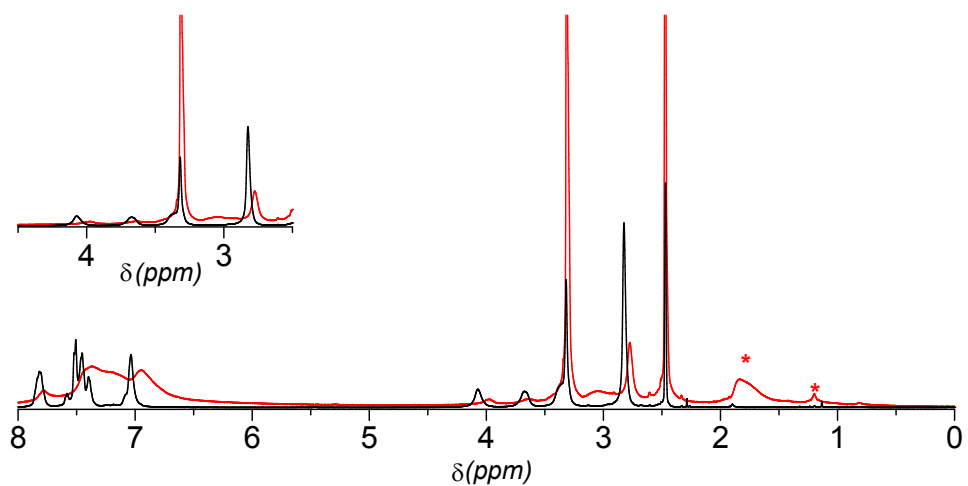

**Fig. S13**  $^1\text{H}$  NMR spectra of the pristine (black, 0 h) and post-test (red, 300 h) QBAF-BS2.25 membrane.

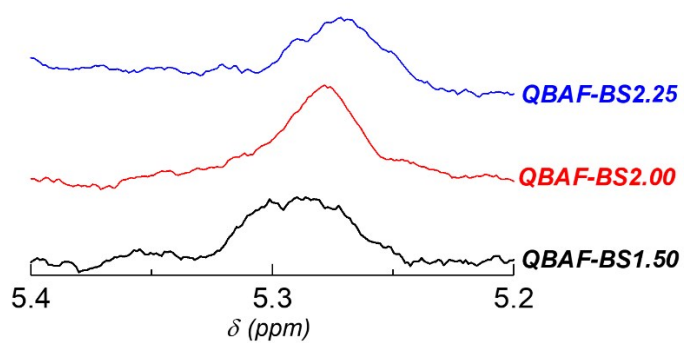

**Fig. S14**  $^1\text{H}$  NMR spectra of QBAF-BS copolymers after the alkaline stability test.

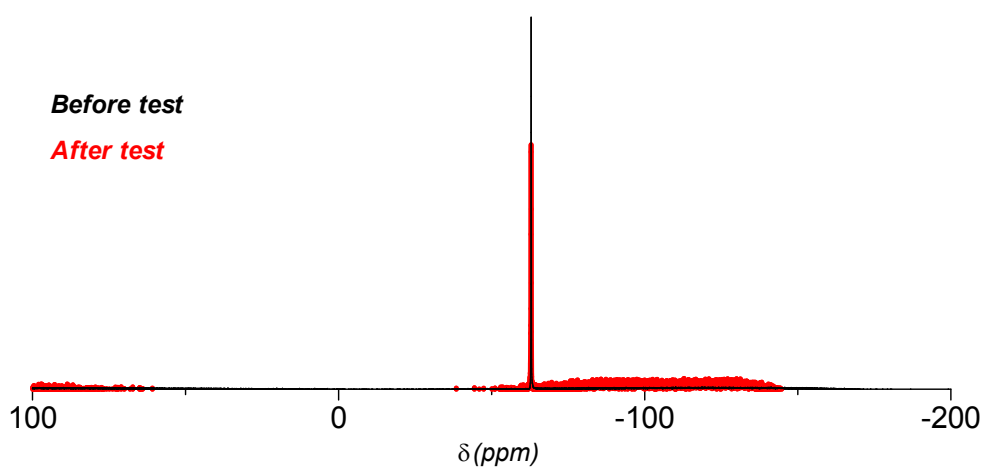

**Fig. S15**  $^{19}\text{F}$  NMR spectra of QBAF-BS1.50 before (black, 0 h) and after (red, 300 h) the alkaline stability test.

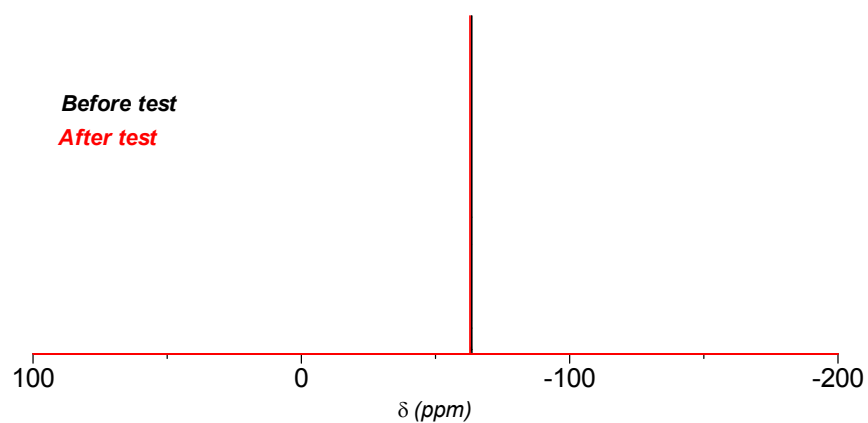

**Fig. S16**  $^{19}\text{F}$  NMR spectra of QBAF-BS2.00 before (black, 0 h) and after (red, 150 h) the alkaline stability test.

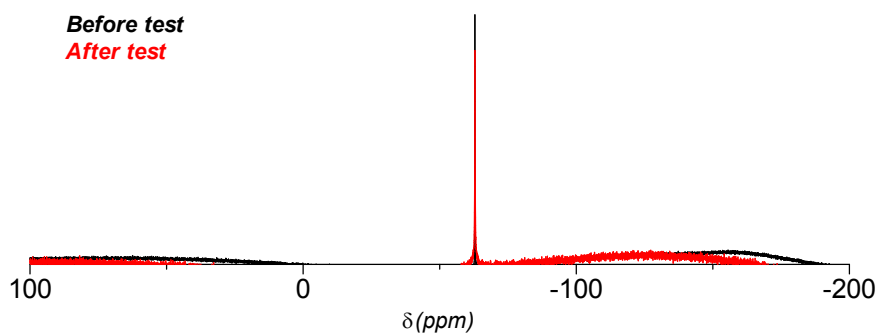

**Fig. S17**  $^{19}\text{F}$  NMR spectra of QBAF-BS2.25 before (black, 0 h) and after (red, 300 h) the alkaline stability test.

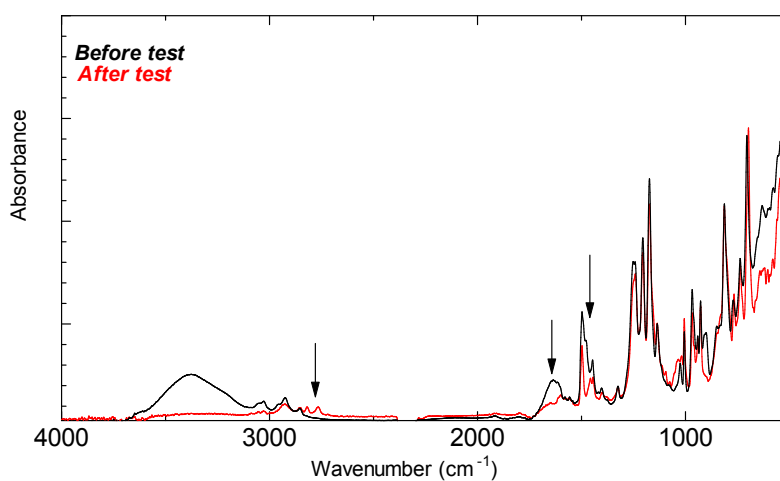

**Fig. S18** FTIR spectra of the pristine (black, 0 h) and post-test (red, 150 h) QBAF-BS2.00 membrane.

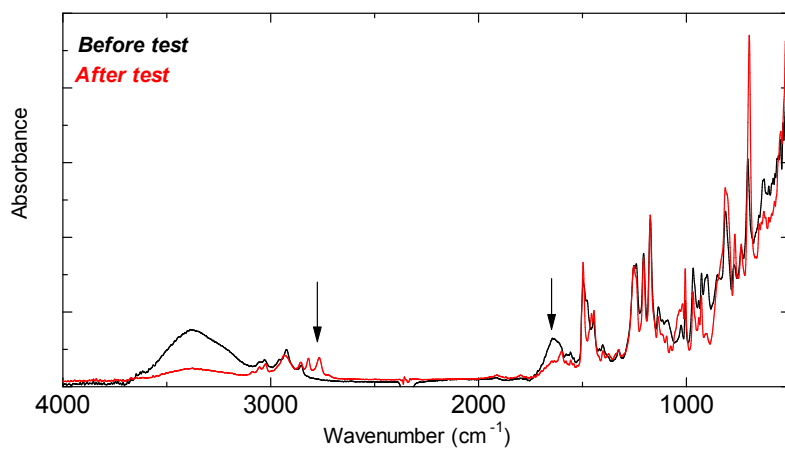

**Fig. S19** FTIR spectra of the pristine (black, 0 h) and post-test (red, 300 h) QBAF-BS2.25 membrane.

### Reference

1 D. Koronka, A. M. A. Mahmoud and K. Miyatake, *J. Polym. Sci., A: Polym. Chem.*, 2019, **57**, 1059-1069.
